# Supplementary material for: A self-powered high performance UV-Vis-NIR broadband photodetector based on β-Bi2O3 nanoparticles through defect engineering
Source: Royal Society of Chemistry journal article supplement (doi:10.1039/d1tc05646h), 2022-01-01
Supplement: d1tc05646h1.pdf [file d1tc05646h1.pdf]

## Supporting Information

### Self-powered high performance UV-Vis-NIR broadband photodetector based on $\beta$ - $\text{Bi}_2\text{O}_3$ nanoparticles through defect engineering

*Song Yang,<sup>a</sup> Shujie Jiao,<sup>\*a</sup> Yiyin Nie,<sup>a</sup> Hongliang Lu,<sup>a</sup> Shuo Liu,<sup>a</sup> Yue Zhao,<sup>a</sup> Shiyong Gao,<sup>a</sup> Dongbo Wang,<sup>a</sup> Jinzhong Wang<sup>a</sup> and Yongfeng Li<sup>b</sup>*

<sup>a</sup> School of materials science and engineering,

Harbin Institute of Technology, Harbin, 150001, China.

\*Email: shujiejiao@hit.edu.cn (S. Jiao)

<sup>b</sup> Key Laboratory for Physics and Technology for Advanced Batteries, Ministry of Education,  
College of Physics, Jilin University, Changchun 130012, China.

#### S 1. Theoretical calculation of tetragonal $\text{Bi}_2\text{O}_3$ crystal structure

Tetragonal  $\text{Bi}_2\text{O}_3$  crystal structure was calculated using the projector-enhanced wave (PAW) method and based on the generalized Kohn-Sham theory,<sup>1,2</sup> as implemented in the Vienna ab-initio simulation package (VASP).<sup>3-5</sup> The atomic structure was derived from the Materials Project database.<sup>6</sup> 5d, 6s, and 6p electrons were selected as the valence electrons of Bi, and the 2s and 2p electrons were selected as the valence electrons of O. The PBE function and the Monkhorst-Pack k-points setting of the  $9 \times 9 \times 15$  mesh were used for geometric optimization.<sup>7</sup> The positions of the atom were relaxed until all the forces on the atoms were below  $0.01 \text{ eV}/\text{\AA}$ , and the cut-off energy of the basis function was 400 eV. The calculated atomic structure was observed through the post-processing program VESTA.<sup>8</sup>

## Reference

- 1 L. J. Sham and W. Kohn, Phys. Rev., 1966, **145**, 561.
- 2 W. Kohn and L. J. Sham, Phys. Rev., 1965, **140**, A1133.
- 3 P. E. Blöchl, Phys. Rev. B, 1994, **50**, 17953.
- 4 G. Kresse and J. Furthmüller, Phys. Rev. B, 1996, **54**, 11169.
- 5 G. Kresse and D. Joubert, Phys. Rev. B, 1999, **59**, 1758.
- 6 A. Jain, S. P. Ong, G. Hautier, W. Chen, W. D. Richards, S. Dacek, S. Cholia, D. Gunter, D. Skinner, G. Ceder and K. A. Persson, APL mater., 2013, **1**, 011002.
- 7 J. P. Perdew, K. Burke and M. Ernzerhof, Phys. Rev. Lett., 1996, **77**, 3865.
- 8 K. Momma and F. Izumi, J. appl. Cryst., 2011, **44**, 1272-1276.

## S 2. The EDS spectrum, TEM and HRTEM images of the raw material $\text{Bi}_2\text{O}_3$

As shown in Fig. S1(a) EDS spectrum of the raw material  $\text{Bi}_2\text{O}_3$ , the atomic ratio of Bi to O is 25.93:74.07 (less than the stoichiometric ratio of 2:3), which can be attributed to the elemental O in the test environment. Additionally, signals for elements C, Al, Si, and Pt are also detected, which can also be attributed to the test environment. Furthermore, the morphology and structure of the raw material  $\text{Bi}_2\text{O}_3$  were also characterized using TEM. As shown in Fig. S1(b), the raw material  $\text{Bi}_2\text{O}_3$  is formed by agglomerates of blocks with a length of about 1.2  $\mu\text{m}$  and a width of about 1.0  $\mu\text{m}$ , which is consistent with the SEM analysis results. The HRTEM image (Fig. S1(c)) shows that the crystallographic planes d-spacing of the raw material  $\text{Bi}_2\text{O}_3$  is 0.24 nm, which corresponds to the (130) plane of the monoclinic  $\alpha\text{-Bi}_2\text{O}_3$ , which is consistent with the XRD analysis results.

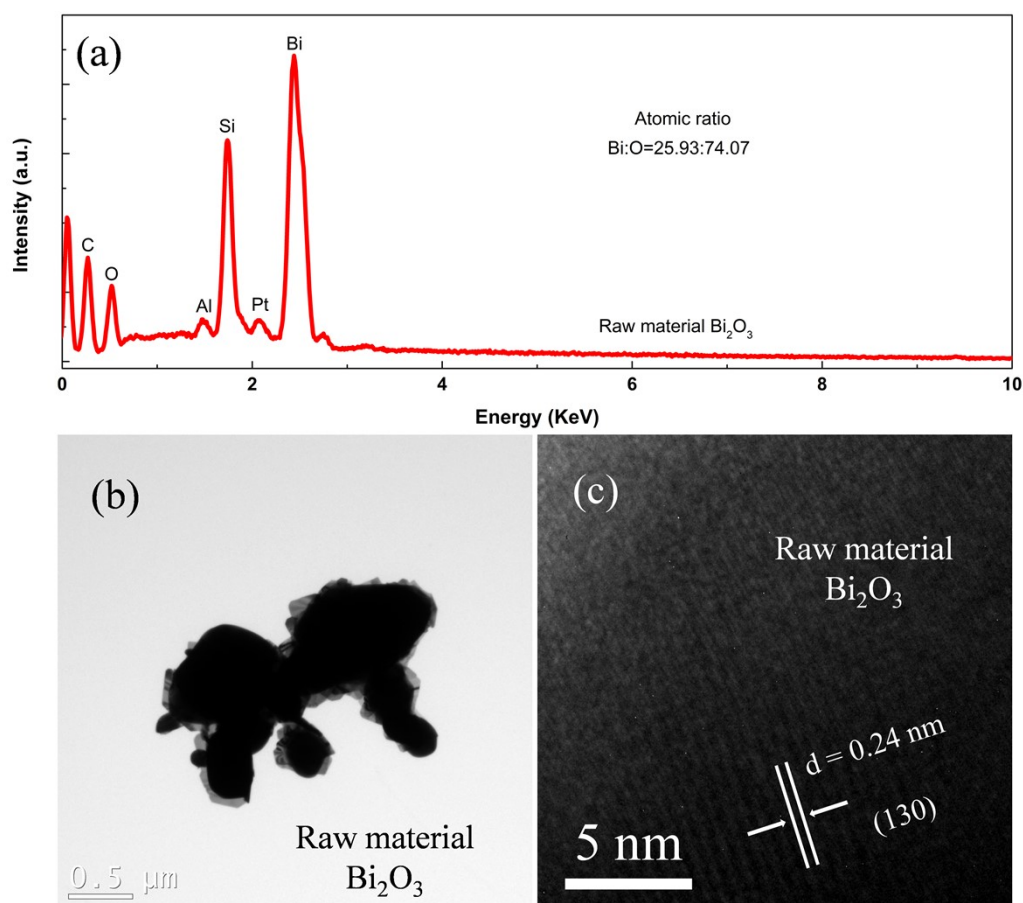

**Fig. S1** EDS spectrum (a), TEM (b), and HRTEM images (c) of the raw material  $\text{Bi}_2\text{O}_3$ .

### S 3. XPS spectra of raw material $\text{Bi}_2\text{O}_3$

From the XPS survey in Fig. S2(a), only the characteristic peaks of Bi, O, and C are observed. The characteristic peak of C can be attributed to  $\text{CO}_2$  in the atmosphere. In the high-resolution XPS spectrum of Bi 4f (Fig. S2(b)), the raw material  $\text{Bi}_2\text{O}_3$  also exhibits two characteristic peaks at 163.6 and 158.3 eV, which can be attributed to  $\text{Bi}^{3+}$  in  $\text{Bi}_2\text{O}_3$ . In the high-resolution XPS spectrum of O 1s (Fig. S2(c)), the raw material  $\text{Bi}_2\text{O}_3$  also exhibits an asymmetric broad band in the range of 533 to 528 eV, which can be fitted to two peaks at 530.2 and 529.0 eV by Gaussian fitting. They can also be assigned to  $\text{V}_\text{o}$  and Bi-O, respectively, and the intensity ratio of the two peaks is 1.0.

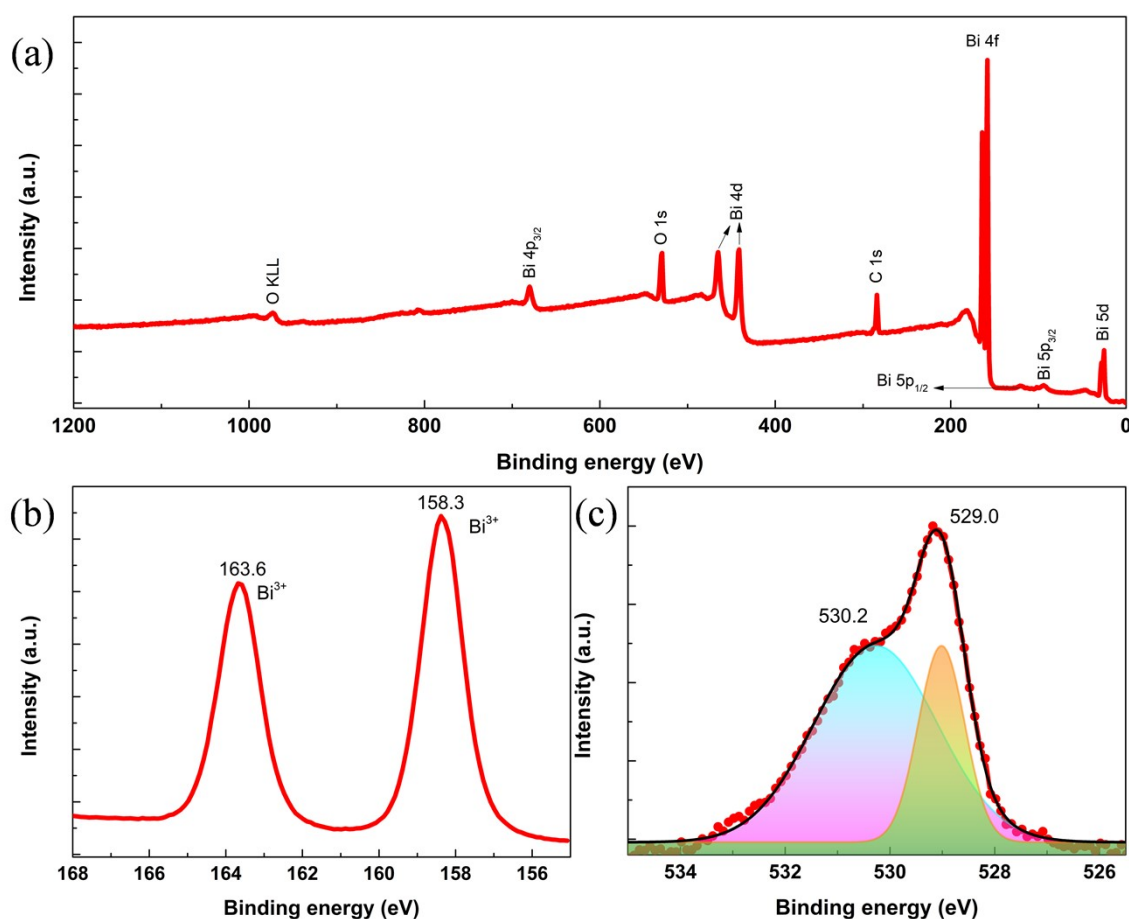

**Fig. S2** XPS spectra of raw materia  $\text{Bi}_2\text{O}_3$ : (a) survey spectrum; (b) Bi 4f spectrum; (c) O 1s spectrum.

#### S 4. Photoresponse spectrum of bare FTO without Bi<sub>2</sub>O<sub>3</sub> nanoparticles

As shown in Fig. S3, the device based on bare FTO mainly has a weak photoresponse under monochromatic light illumination with wavelength of 365 nm.

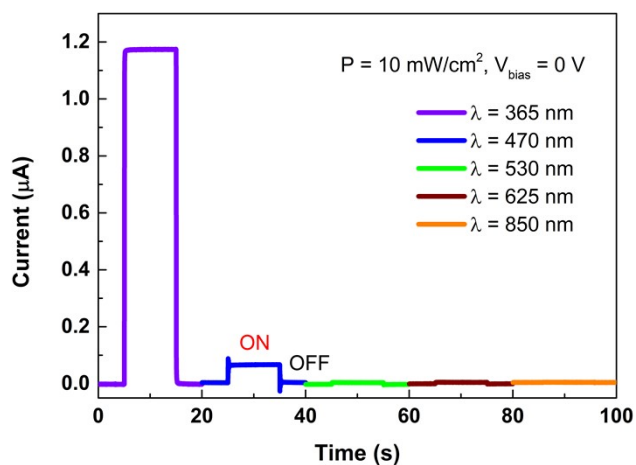

**Fig. S3** Photoresponse spectra of bare FTO without Bi<sub>2</sub>O<sub>3</sub> nanoparticles illuminated by various wavelengths (365, 470, 530, 625 and 850 nm) with power of 10 mW/cm<sup>2</sup>.
